# Supplementary material for: Organocatalytic domino reaction of salicyl N-thiophosphoryl imines and methyl vinyl ketone initiated by an aza-MBH reaction with bifunctional phosphine catalysts
Source: Royal Society of Chemistry journal article supplement (doi:10.1039/c2ra20823g), 2012-01-01

Supplementary Information for

**Organocatalytic domino reaction of salicyl N-thiophosphoryl imines and methyl vinyl ketone initiated by aza-MBH reaction with bifunctional phosphine catalysts**

Xiangtai Meng, Peizhong Xie, You Huang\* and Ruyi Chen

State Key Laboratory and Institute of Elemento-Organic Chemistry, Nankai University, Tianjin 300071, China.

hyou@nankai.edu.cn

Representative NMR spectra of **3**

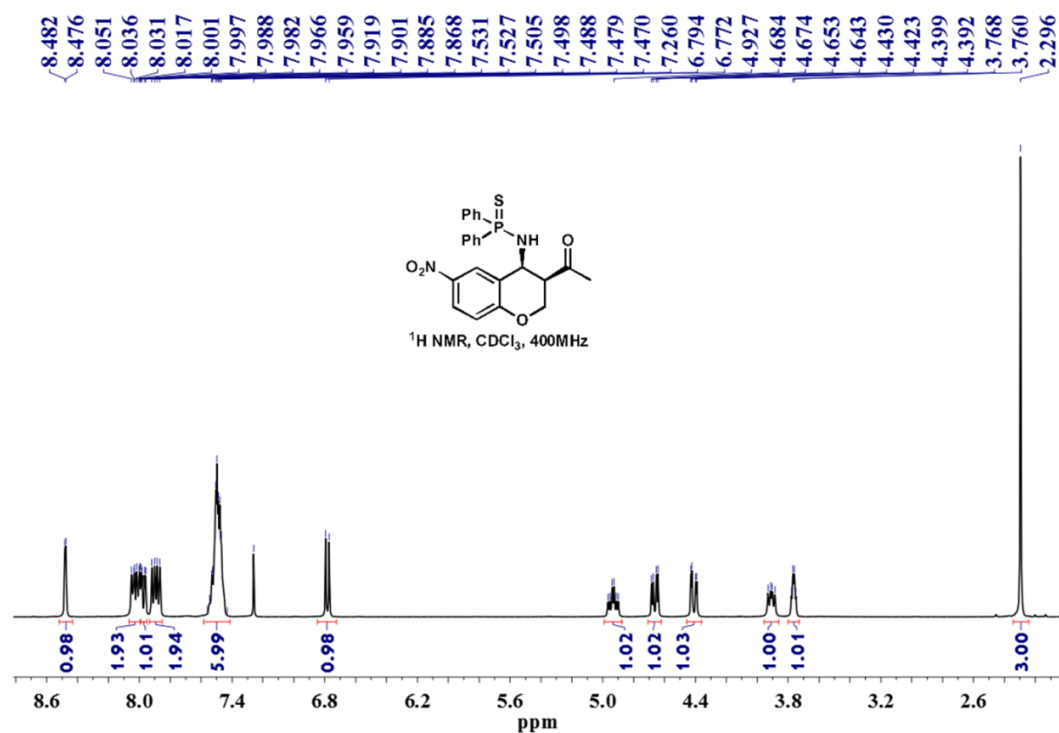

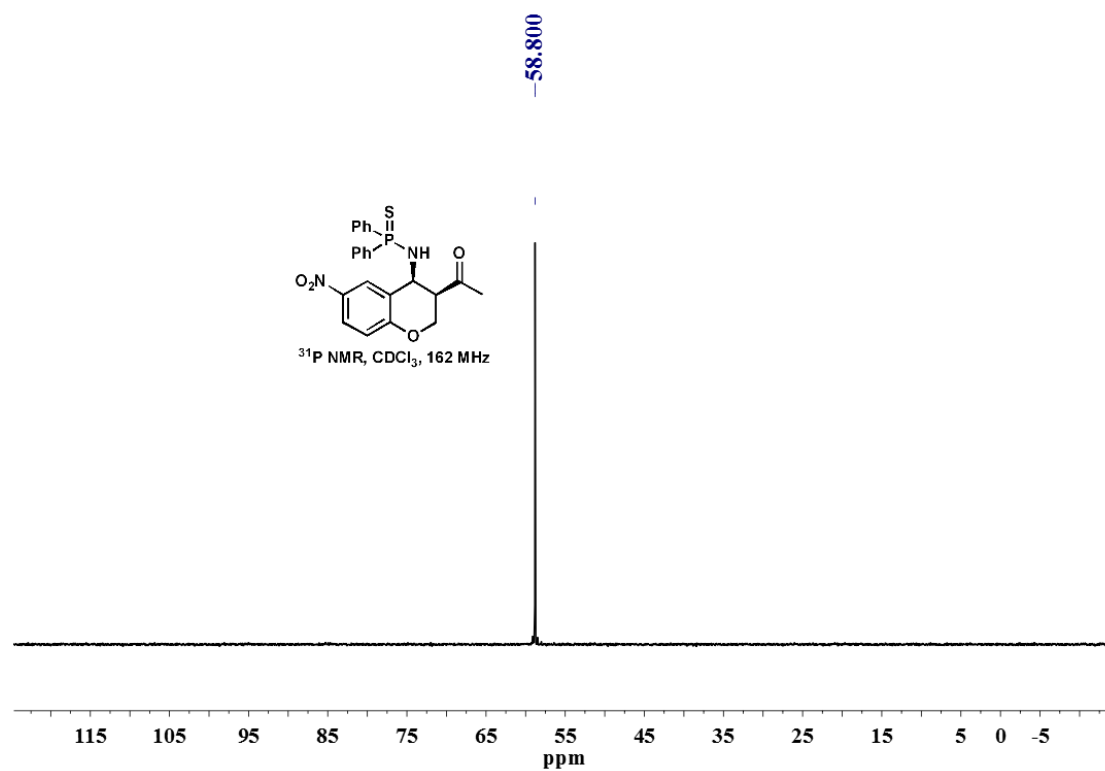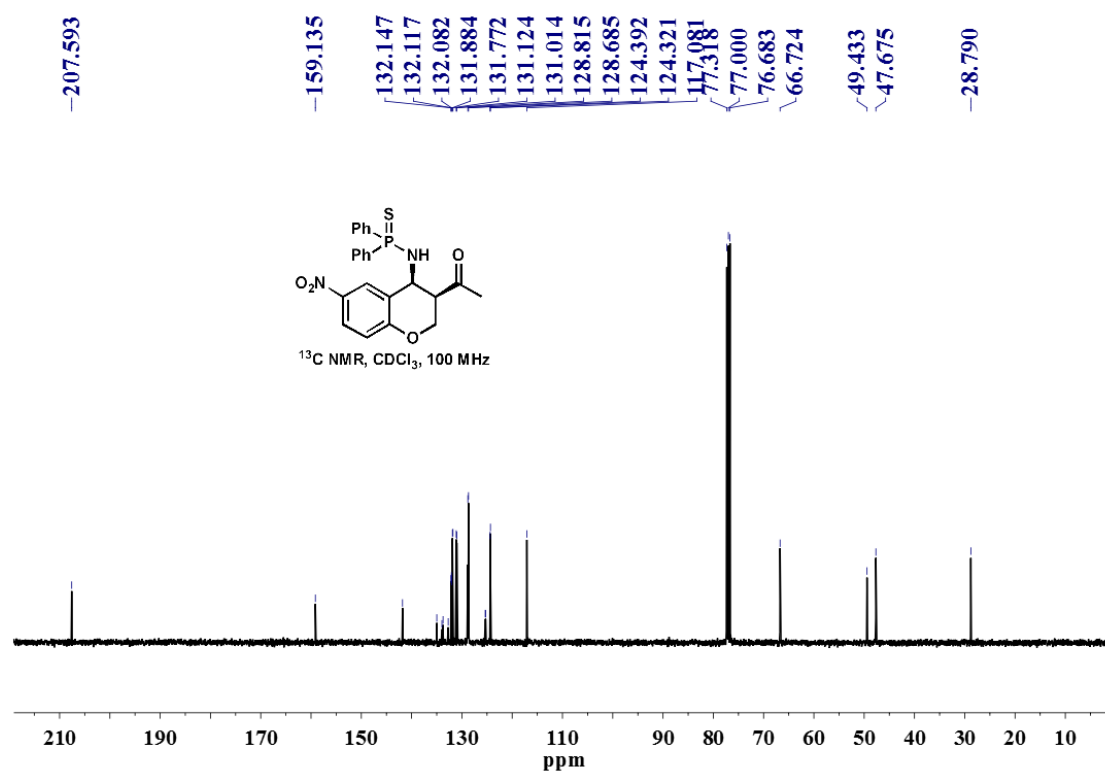

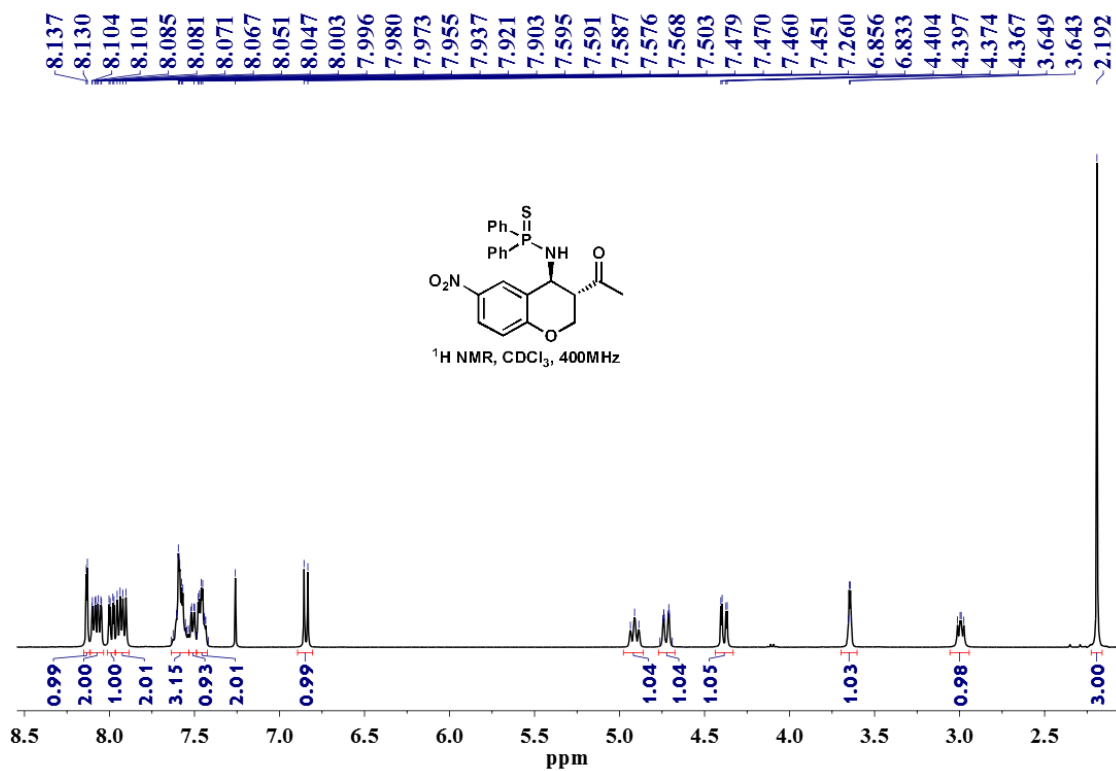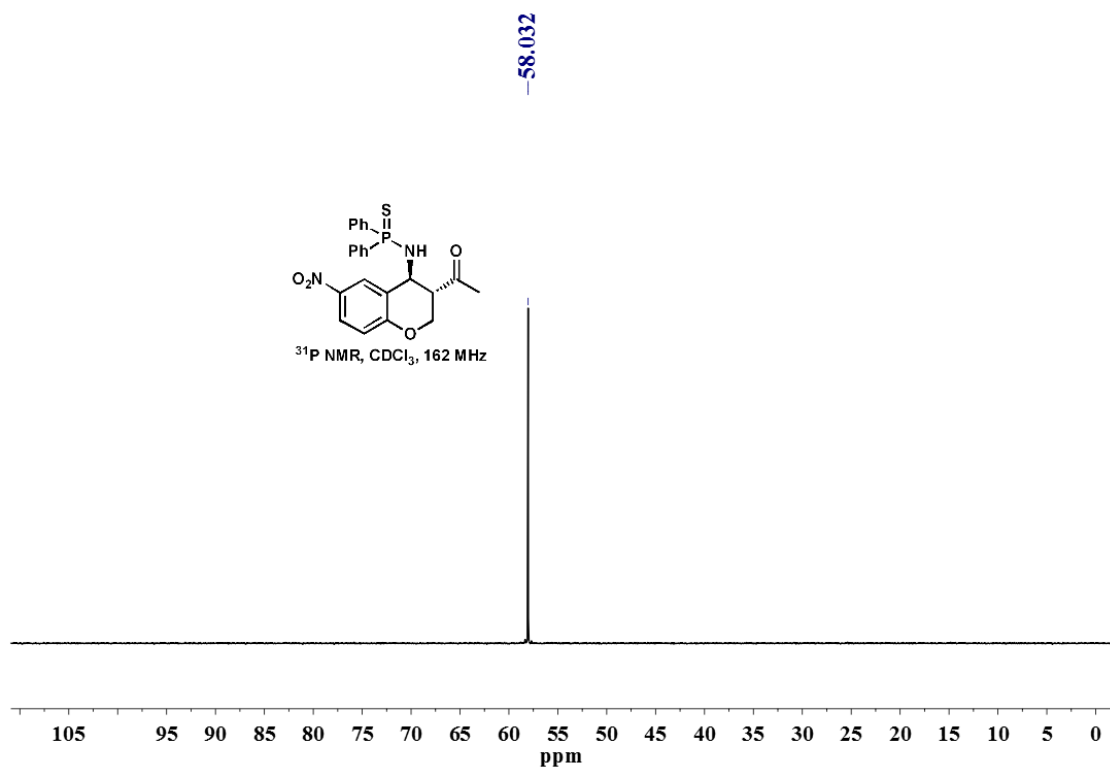

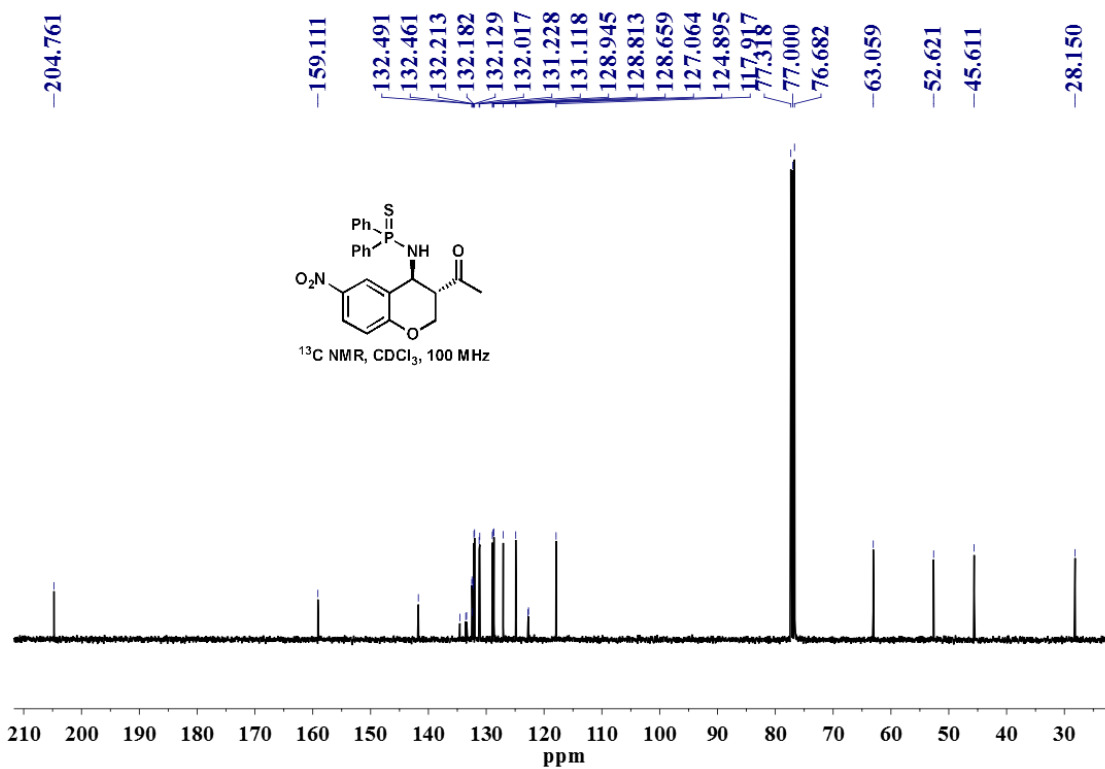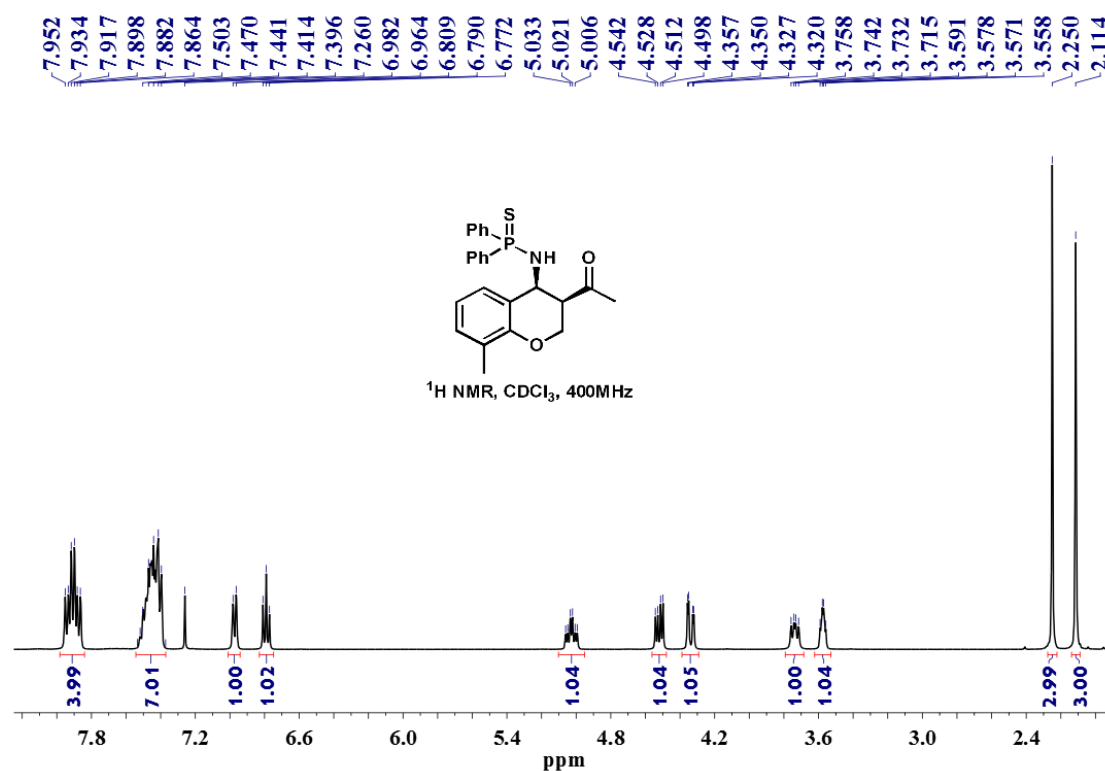

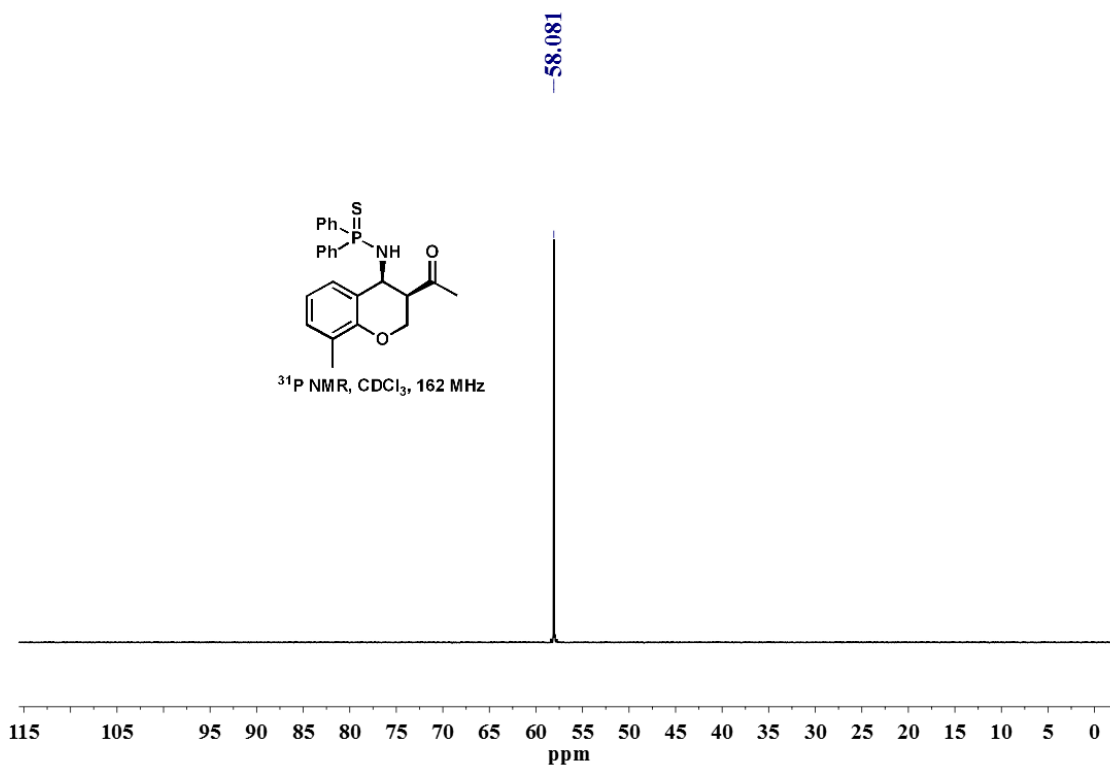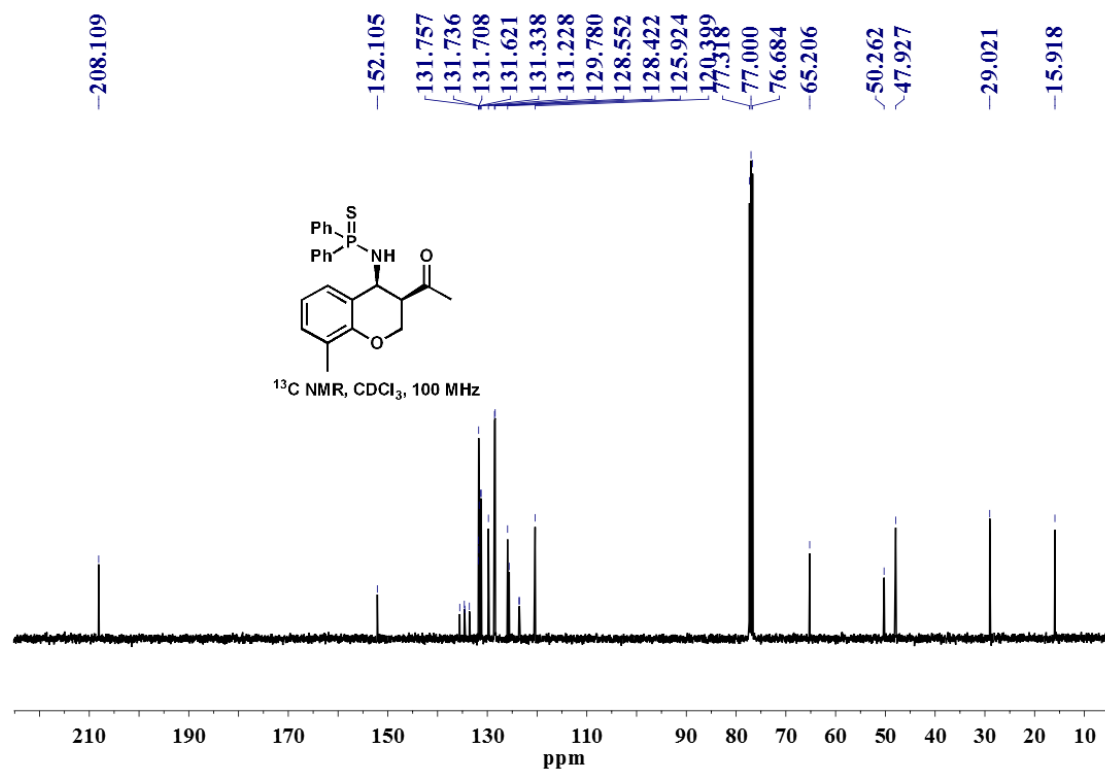

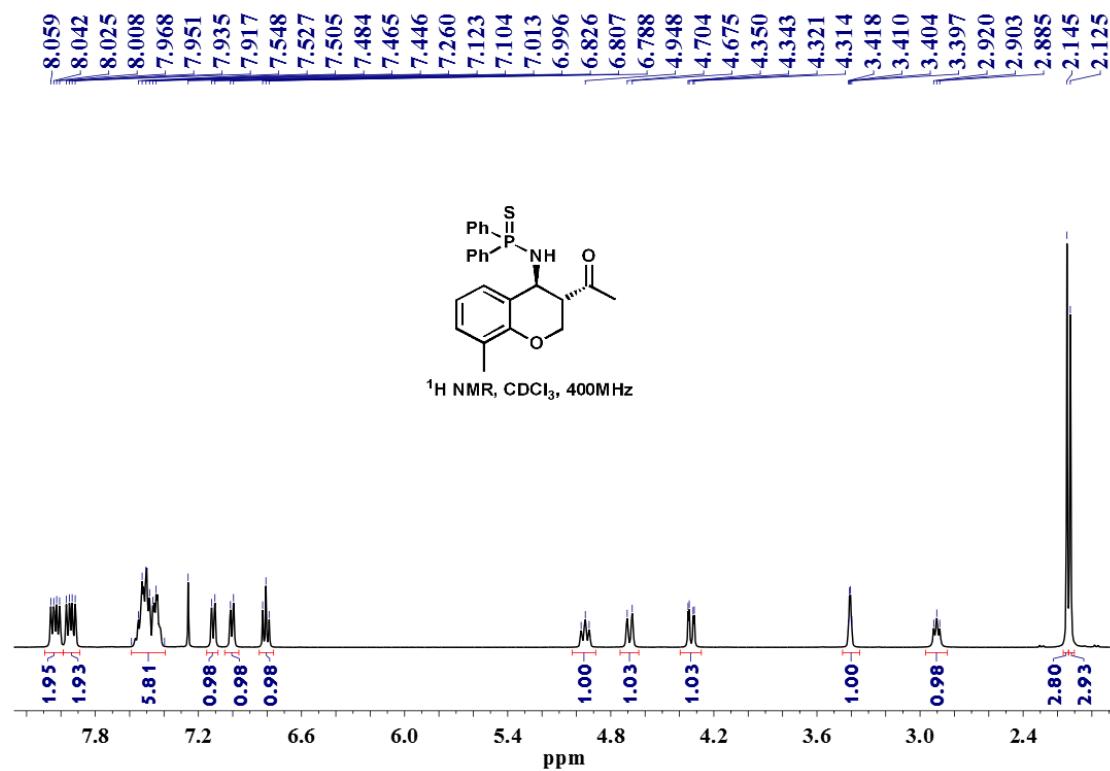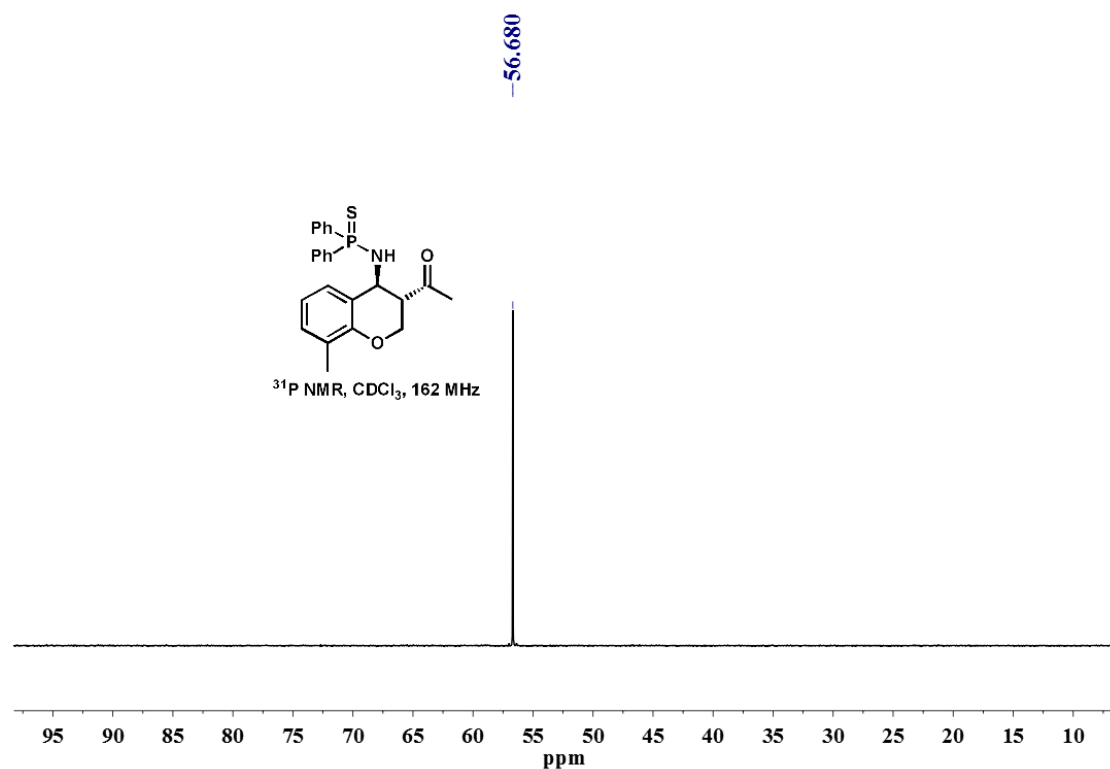

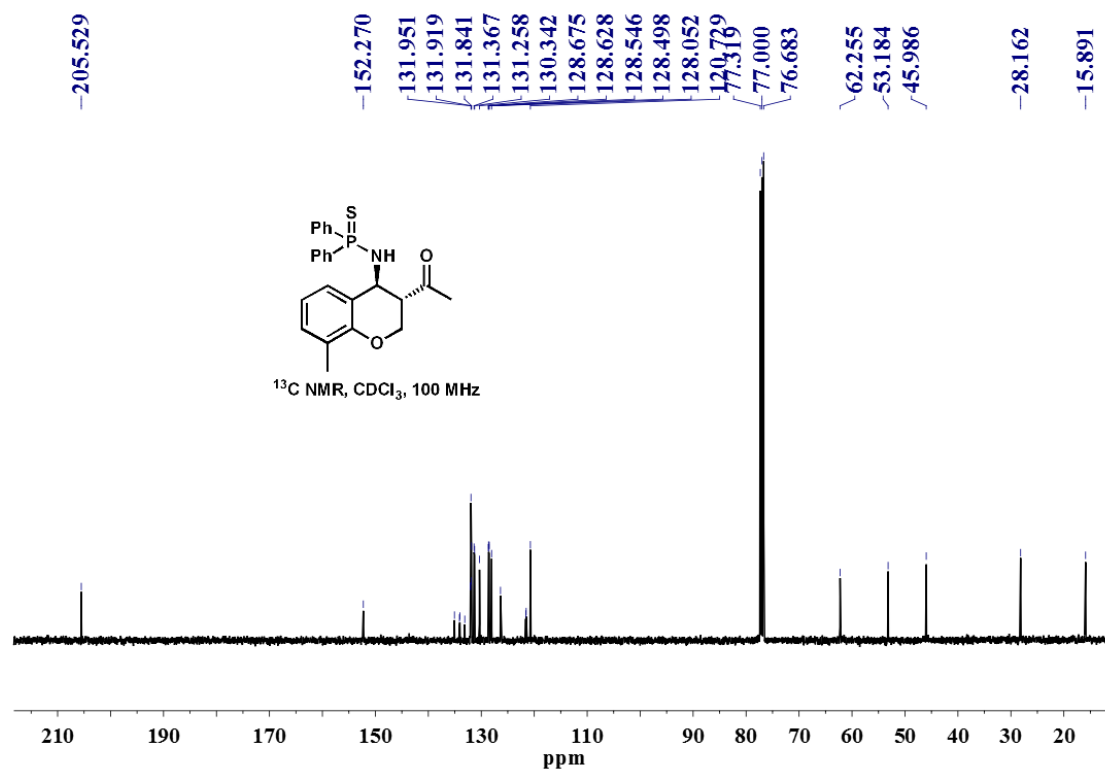

Supplement: c2ra20823g.pdf [file c2ra20823g.pdf]
